# Supplementary material for: Impact of Albumin Pre-Coating on Gold Nanoparticles Uptake at Single-Cell Level
Source: MDPI journal article supplement (doi:10.3390/nano12050749), 2022-02-23
Supplement: s1 [file s1]

## Supporting Information

# Impact of Albumin Pre-Coating on Gold Nanoparticles Uptake at Single-Cell Level

Tao Li <sup>1</sup>, Yun Wang <sup>2,3</sup>, Meng Wang <sup>2</sup>, Lingna Zheng <sup>2</sup>, Wanqin Dai <sup>2,3</sup>, Chunlei Jiao <sup>2,3</sup>, Zhuda Song <sup>2,3</sup>, Yuhui Ma <sup>2</sup>, Yayun Ding <sup>2</sup>, Zhiyong Zhang <sup>2,3,\*</sup>, Fang Yang <sup>1,\*</sup> and Xiao He <sup>2,\*</sup>

- <sup>1</sup> Hebei Provincial Key Lab of Green Chemical Technology & High Efficient Energy Saving, School of Chemical Engineering and Technology, Hebei University of Technology, Tianjin 300130, China; litao95@ihep.ac.cn
- <sup>2</sup> CAS Key Lab for Biomedical Effects of Nanomaterials and Nanosafety, CAS-HKU Joint Laboratory of Metallomics on Health & Environment, Institute of High Energy Physics, Chinese Academy of Sciences, Beijing 100049, China; yunwang@ihep.ac.cn (Y.W.); wangmeng@ihep.ac.cn (M.W.); zhengln@ihep.ac.cn (L.Z.); daiwanqin@ihep.ac.cn (W.D.); jiaocl@ihep.ac.cn (C.J.); songzhuda@ihep.ac.cn (Z.S.); mayh@ihep.ac.cn (Y.M.); dingyy@ihep.ac.cn (Y.D.)
- <sup>3</sup> School of Physical Sciences, University of the Chinese Academy of Sciences, Beijing 100049, China
- \* Correspondence: zhangzhy@ihep.ac.cn (Z.Z.); yangfang@hebut.edu.cn (F.Y.); hexiao@ihep.ac.cn (X.H.)

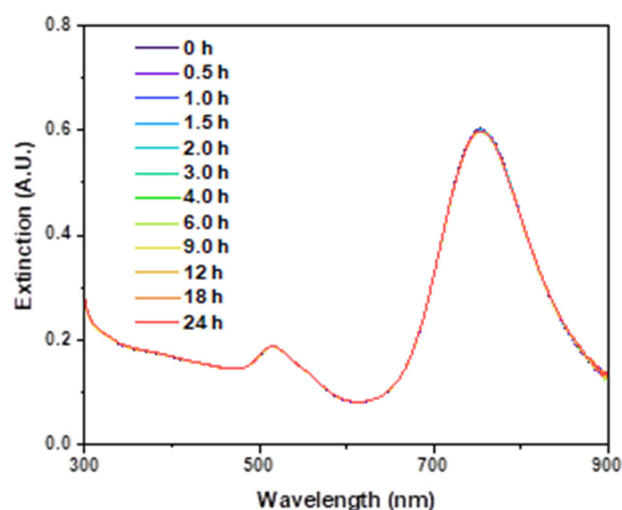

**Figure S1.** The extinction spectra of 10 µg/mL AuNRs@BSA<sub>100</sub> in ultrapure water within a 24-h standing.

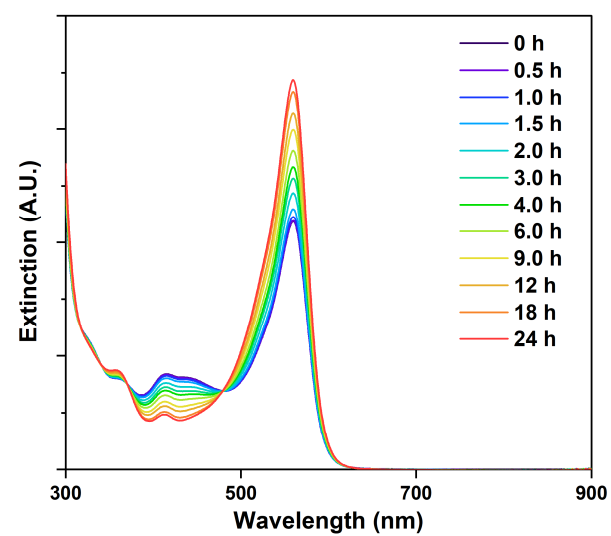

**Figure S2.** The extinction spectra of cell culture medium within a 24-h standing.
